# Supplementary material for: RAM/Fam103a1 Is Required for mRNA Cap Methylation
Source: PubMed Central journal article supplement (PMC3235549; doi:10.1016/j.molcel.2011.08.041), 2011-11-18
Supplement: mmc1.pdf [file mmc1.pdf]

**Molecular Cell, Volume 44**

**Supplemental Information**

**RAM/Fam103a1 Is Required for mRNA Cap Methylation**

**Thomas Gonatopoulos-Pournatzis, Sianadh Dunn, Rebecca Bounds, and Victoria H. Cowling**

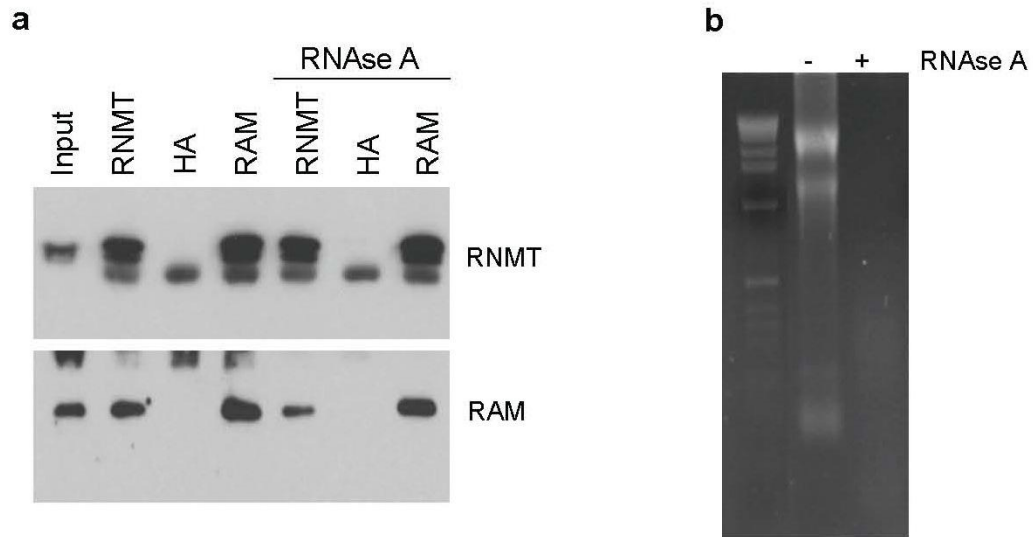

**Figure S1, Related to Figure 1. RNase Treatment Does Not Inhibit the RNMT-RAM Interaction**

(a) HeLa cell extracts were subject to immunoprecipitation using polyclonal anti-RNMT, RAM and HA (negative control) antibodies, as indicated above the panel. Immunoprecipitations were performed as described in experimental procedures followed by three washes in RNase A buffer. 10 $\mu$ g of RNase or control were incubated with immunoprecipitates for 60 mins at 4 $^{\circ}$ C, as indicated. RNMT and RAM were detected in the immunoprecipitates by western blot. Input lane is 20 $\mu$ g cell extract.

(b) The activity of RNase A was confirmed by incubating 1 $\mu$ g cellular RNA with (+) or without (-) 10 $\mu$ g RNase A under the same conditions. RNA was purified and resolved by gel electrophoresis.

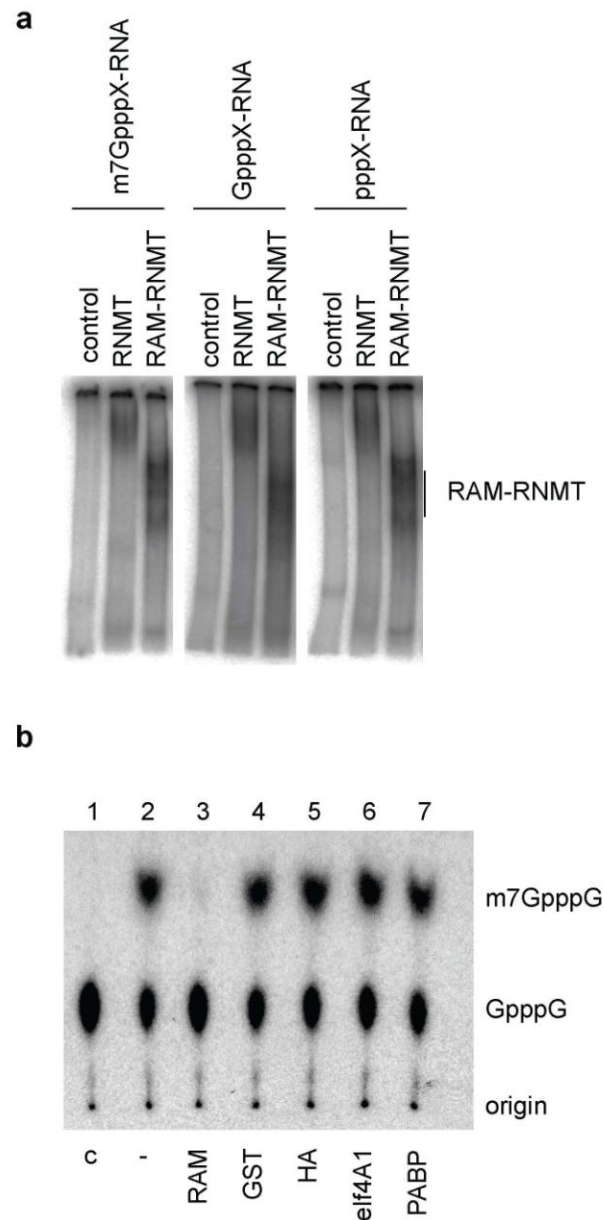

**Figure S2, Related to Figure 3. RAM-RNMT Complexes Bind Equivalently to Uncapped, Capped, and Methyl Capped RNA**

(a) RNA bandshift assay was performed as described in the experimental procedures except the RNA probe was methylcapped (m7GpppX), capped (GpppX), or uncapped (pppX).

(b) Anti-RAM antibodies inhibit the cap methyltransferase activity of cell extracts. Cap methyltransferase assay was performed on 1 $\mu$ g 293 cell extract (lanes 2-7), as in fig. 4.g. Prior to the assay, extracts were incubated with antibodies raised against RAM, GST, HA, eIF4A1, PABP, as indicated.

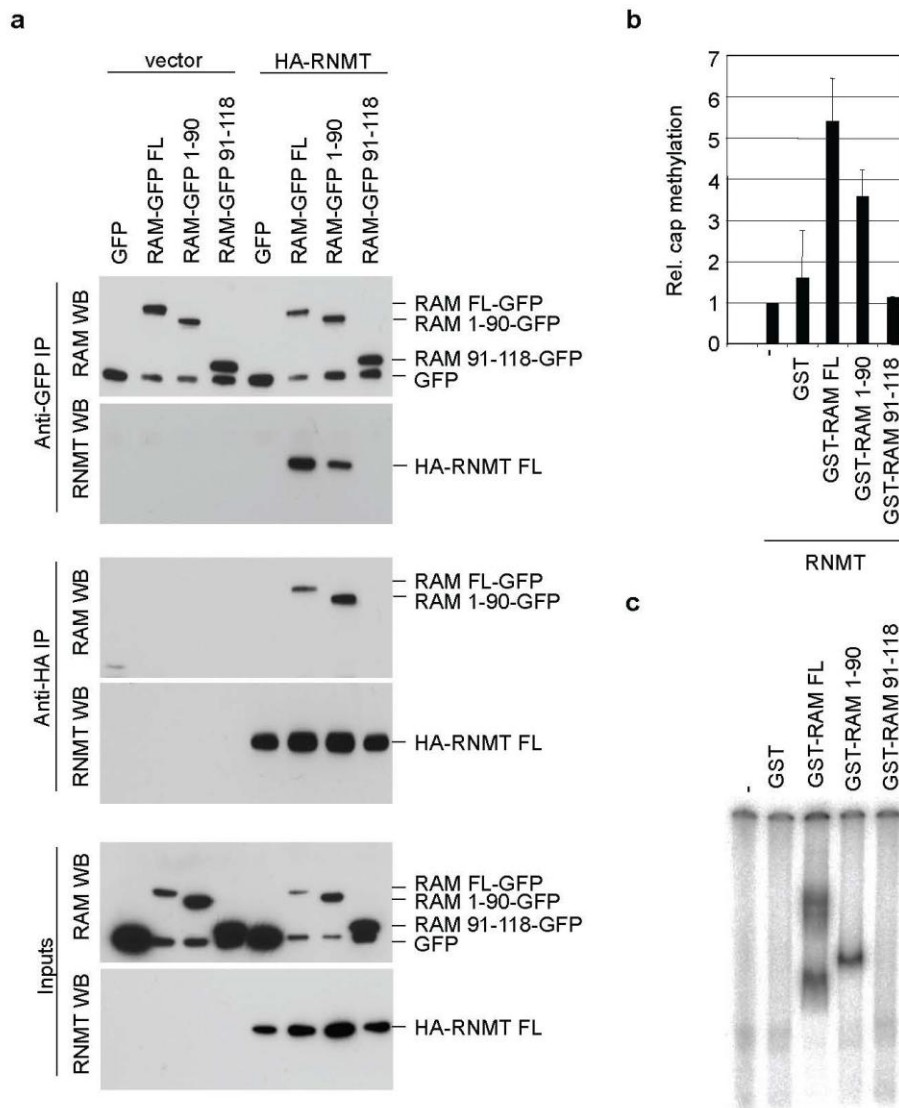

**Figure S3, Related to Figure 4. RAM 1-90 Interacts with RNMT and RNA, and Activates Cap Methylation**

(a) 293 cells were transfected with the combinations of pEGFP-RAM and pCDNA-HA-RNMT, deletion mutants and vector controls, as indicated. Immunoprecipitations were performed with anti-HA and anti-GFP antibodies. Western Blots were performed to detect RAM and RNMT in inputs (lower panels), anti-HA antibody immunoprecipitates (middle panels), and anti-GFP antibody immunoprecipitates (upper panels).

(b) *In vitro* cap methyltransferase assay performed as described in experimental procedures using 20nM recombinant proteins indicated.

(c) RNA band shift assay performed as described in experimental procedures using 2pMoles recombinant protein indicated.

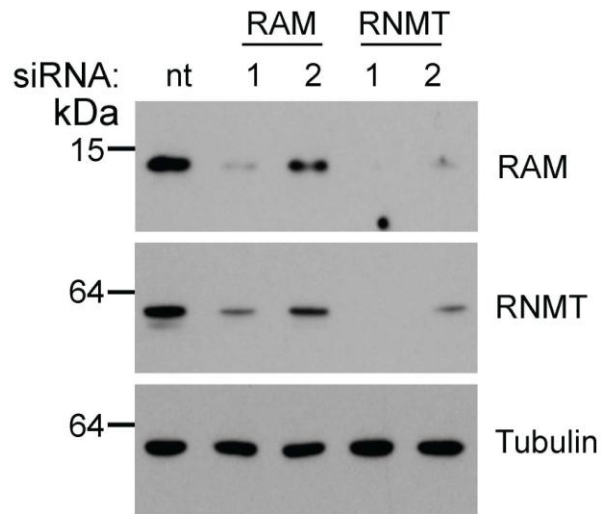

**Figure S4, Related to Figure 5. RNMT-Directed siRNA Inhibits RAM Expression**

HeLa cells were transfected with 2 independent siRNAs directed against RAM and RNMT, or non-targeting control (nt). 48hrs following transfection, RAM RNMT and b-Tubulin were detected by Western Blot.

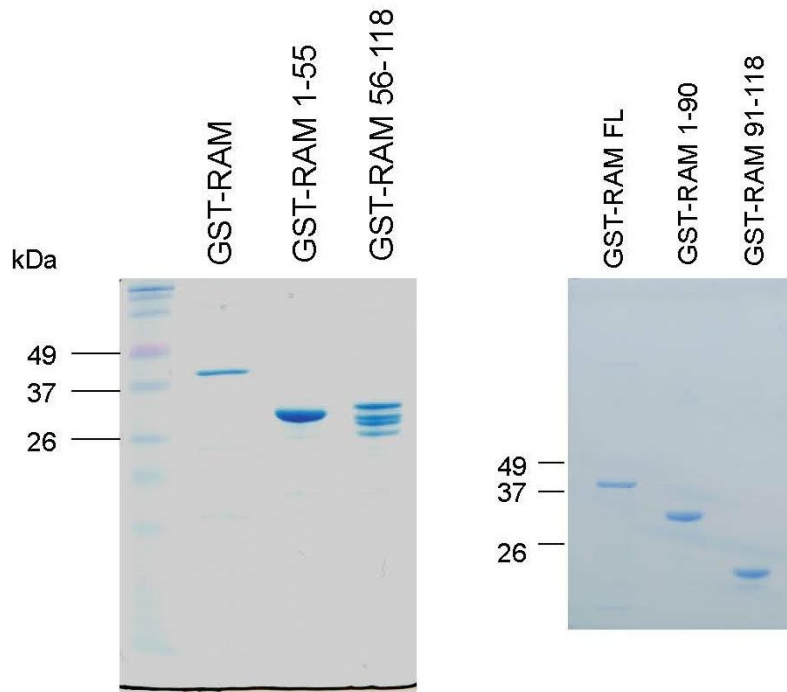

**Figure S5, Related to Experimental Procedures. Recombinant GST-RAM and Mutants Resolved by SDS-PAGE and Stained with Coomassie Blue**
